# Supplementary material for: Political Knowledge Regimes and Policy Coordination: Labor Market Reforms in Chile and Uruguay (2000–2023)
Source: Research Square preprint supplement (doi:10.21203/rs.3.rs-8503812/v1), 2026-02-17
Supplement: Supplementary file 1 [file 54b41b503d743c2cbe6bf601.docx]

**Appendices**

Appendix 1. Policy Stages and the Role of Political Knowledge Regimes (PKRs)

| Policy stage | Role of the PKR |
| --- | --- |
| Problem definition | Determines what is recognized as a public problem |
| Diagnosis | Selects which evidence, data, and theories are considered relevant |
| Policy design | Prioritizes policy solutions and legitimizes expert actors |
| Implementation | Establishes standards, indicators, and methodological frameworks |
| Evaluation | Defines what counts as policy success or failure |

Source: Own elaboration.

Appendix 2. Variations Across Types of Political Knowledge Regimes (PKRs)

| Type of PKR | Legitimation of knowledge | Expected coordination pattern |
| --- | --- | --- |
| Technocracy | High valuation of experts; strong epistemic delegation | Positive, evidence-based coordination; high level of integration in reforms |
| Plebeian majoritarianism | Knowledge subordinated to the interests of the dominant party | High intra-governmental coordination; low intersectoral openness |
| Technocratic pluralism | Competition among expert paradigms | Coordination contingent on institutional design; deliberative potential |
| Plebeian pluralism | Low epistemic delegation; politicization of knowledge | Coordination based on political negotiation and social pressure; risk of fragmentation |

Note: The table illustrates a generalizable analytical principle: the political status attributed to knowledge conditions which forms of intersectoral alignment are deemed legitimate, thereby shaping the prevailing structural pattern of policy coordination.

Source: Own elaboration.
